# Supplementary material for: Synthesis and magnetic properties of tartrate-bridging rare-earth-containing polytungstoarsenate aggregates from an adaptive precursor [As2W19O67(H2O)]14−
Source: Royal Society of Chemistry journal article supplement (doi:10.1039/c4dt01703j), 2014-11-04
Supplement: c4dt01703j1.pdf [file c4dt01703j1.pdf]

## Electronic supplementary Information

### Synthesis of tartrate – bridging rare – earth – containing polytungstoarsenate aggregates from an adaptive precursor

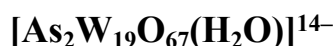

Yuan Wang,<sup>a</sup> Xiaopeng Sun,<sup>a</sup> Suzhi Li,<sup>b</sup> Pengtao Ma,<sup>a</sup> Jingping Wang,<sup>\*,a</sup> Jingyang Niu<sup>\*,a</sup>

<sup>a</sup> Henan Key Laboratory of Polyoxometalate, Institute of Molecular and Crystal Engineering, College of Chemistry and Chemical Engineering, Henan University, Kaifeng 475004, Henan, China. E-mail: [jywang@henu.edu.cn](mailto:jywang@henu.edu.cn), [jyniu@henu.edu.cn](mailto:jyniu@henu.edu.cn), Fax: (+86) 37123886876.

<sup>b</sup> College of Chemistry and Chemical Engineering, Engineering Research Center of Functional Material Preparation, Shangqiu Normal University, Shangqiu, 476000, Henan, China

**Figure S1** The X-ray powder diffraction patterns of **1–6**

**Figure S2** IR spectra of **1–6**.

**Figure S3** The UV–vis spectra of **1–6** with  $5 \times 10^{-5}$  mol/L in aqueous solution.

**Figure S4** The UV–vis spectra of **3** at different pH values.

**Figure S5** The  $\chi_M^{-1}$  vs  $T$  curves of **1(a)**, **2(b)**, **3(c)**, **4(d)**.

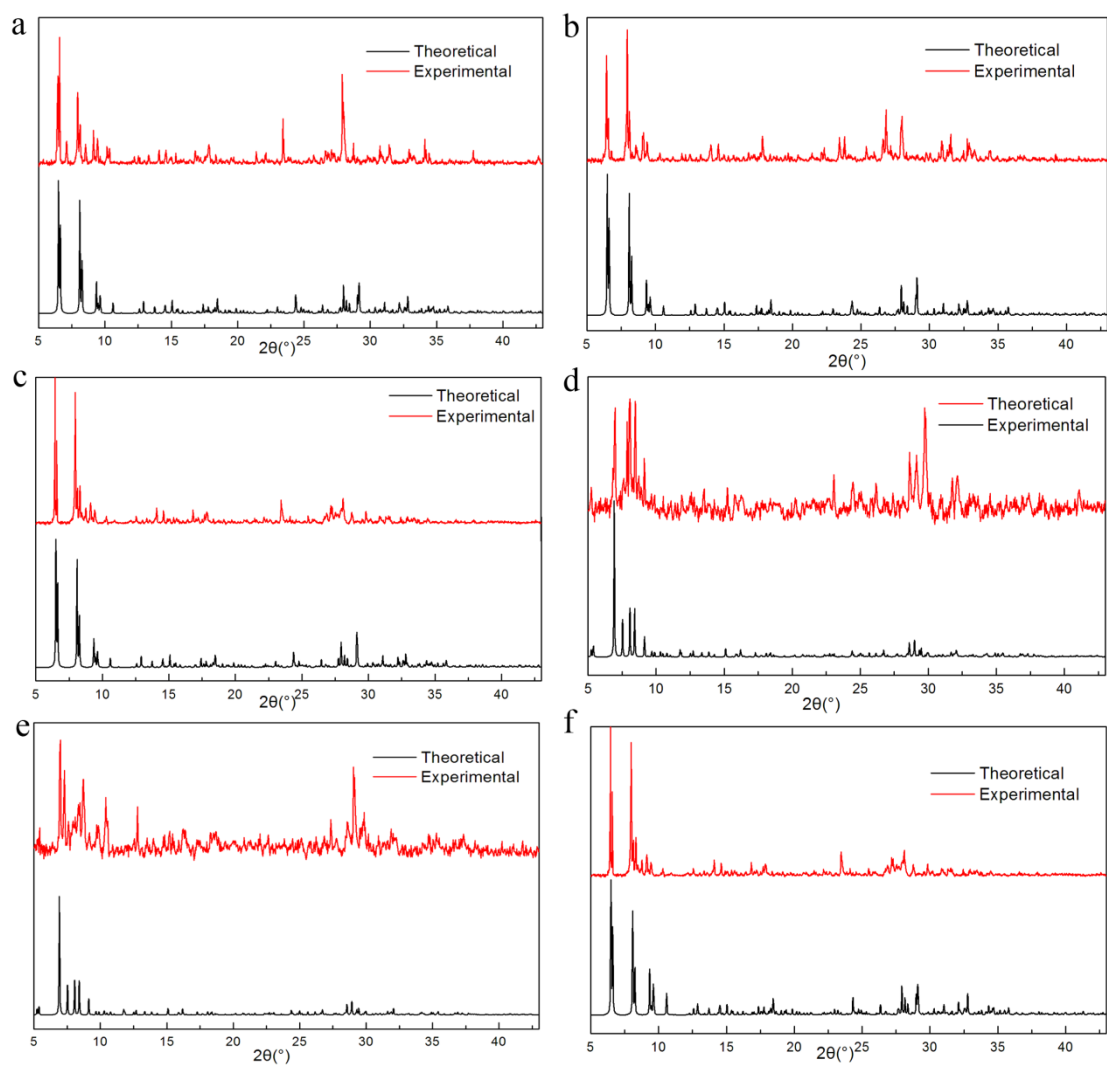

**Figure S1.** The X-ray powder diffraction patterns of **1**(a), **2**(b), **3**(c), **4**(d), **5**(e), **6**(f), and their calculated patterns based on the single-crystal solution.

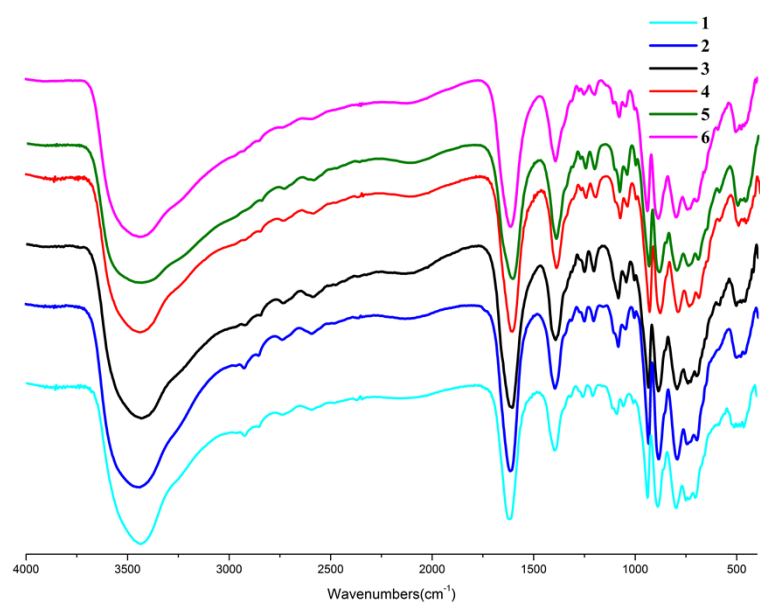

**Figure S2. IR spectra of 1–6.**

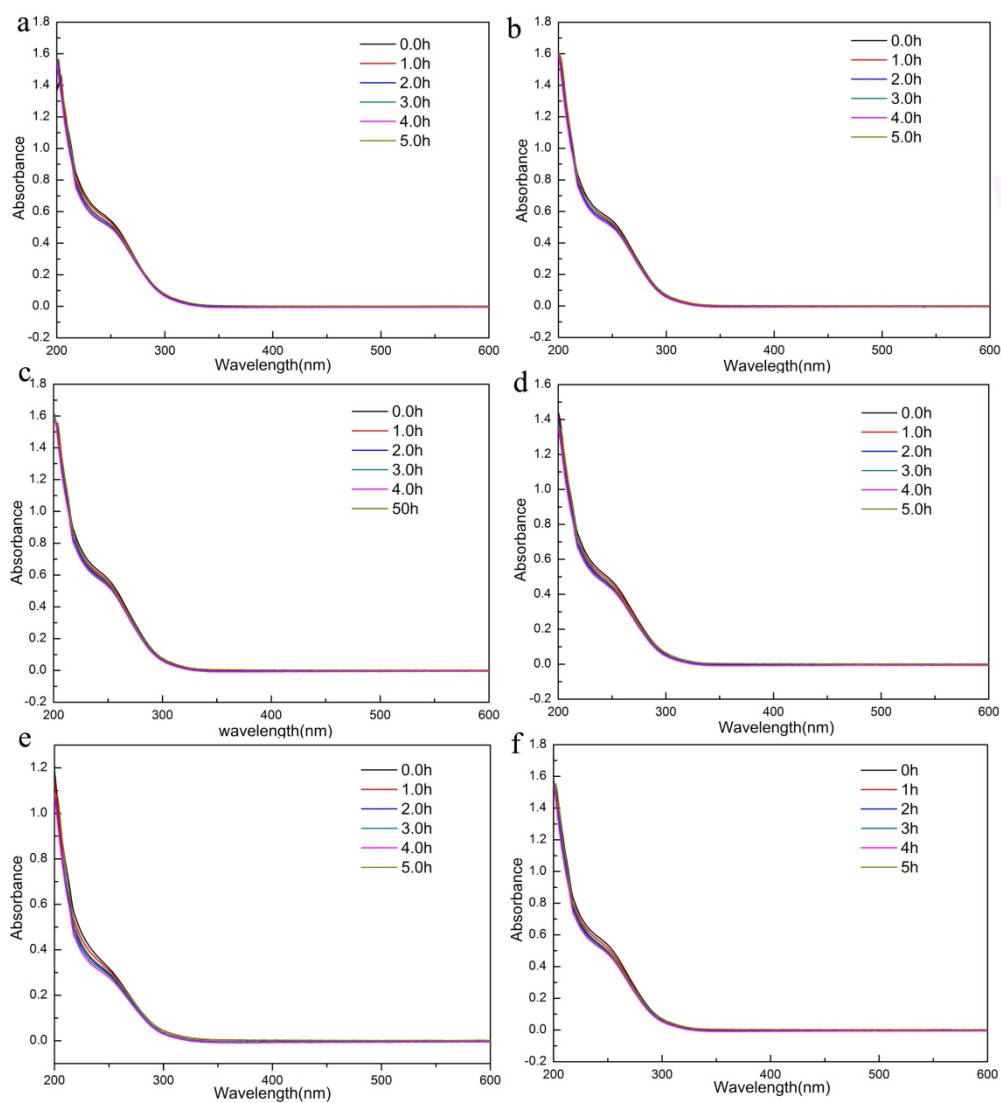

**Figure S3.** The UV-vis spectra of **1**(a), **2**(b), **3**(c), **4**(d), **5**(e), **6**(f) with  $5 \times 10^{-5}$  mol/L in aqueous solution.

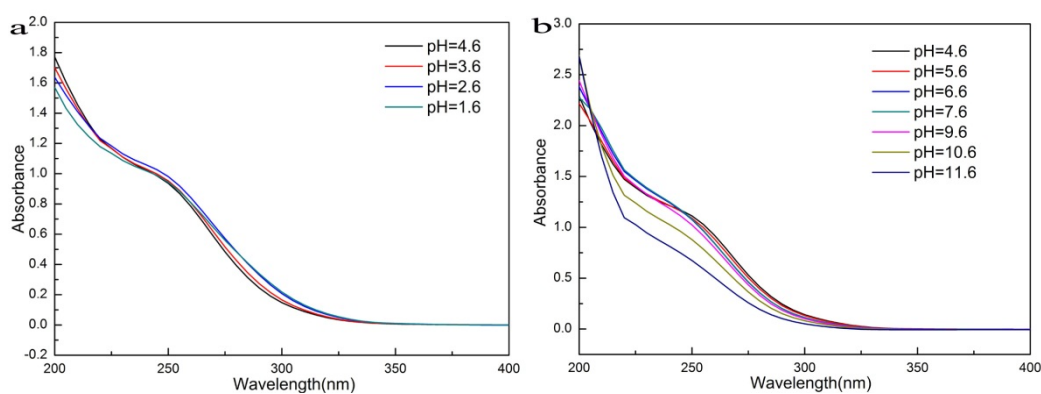

**Figure S4.** The UV-vis spectra of **3** at different pH values.

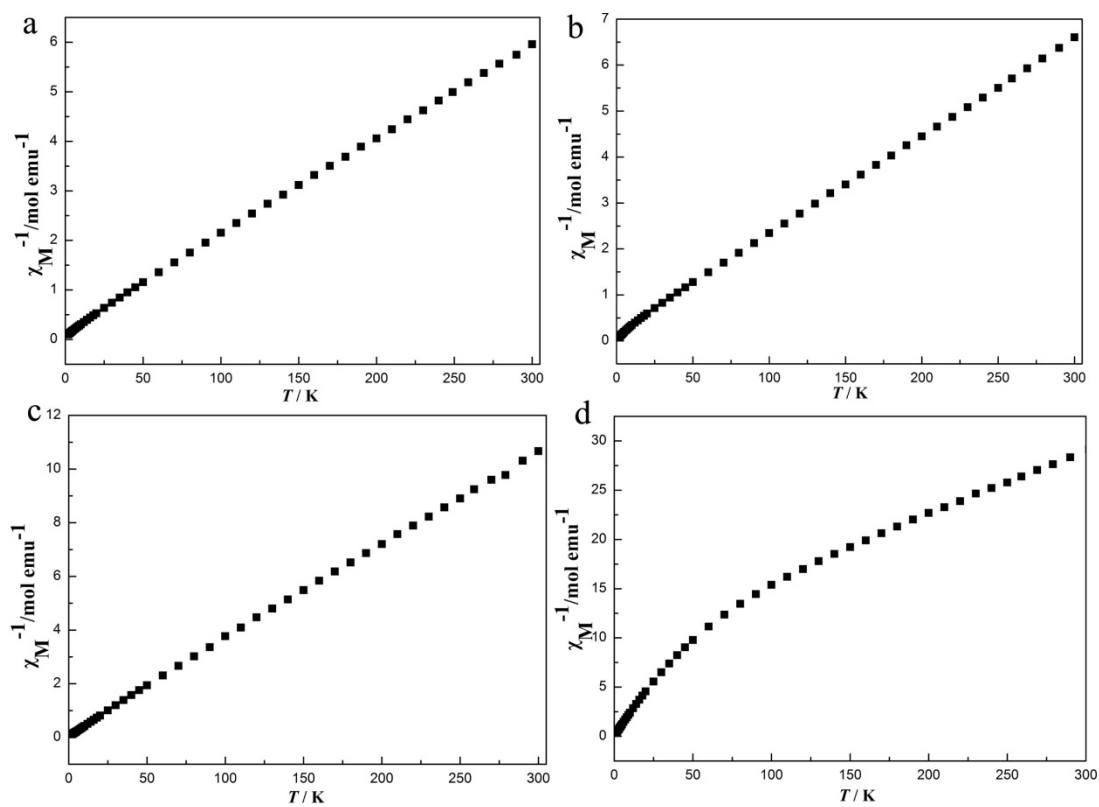

**Figure S5.** The  $\chi_M^{-1}$  vs  $T$  curves of **1**(a), **2**(b), **3**(c), **4**(d).

Table S1 The RE–O bond in compounds 1–6

| Bond (RE–O)   | Bond lengths (Å) | The average bond lengths (Å) |
|---------------|------------------|------------------------------|
| Ho(1)-O(4)    | 2.219            | 2.365                        |
| Ho(1)-O(43)#3 | 2.282            |                              |
| Ho(1)-O(44)#3 | 2.328            |                              |
| Ho(1)-O(37)#3 | 2.348            |                              |
| Ho(1)-O(36)   | 2.365            |                              |
| Ho(1)-O(37)   | 2.407            |                              |
| Ho(1)-O(33)   | 2.412            |                              |
| Ho(1)-O(34)   | 2.453            |                              |
| Ho(2)-O(38)#3 | 2.271            |                              |
| Ho(2)-O(31)   | 2.303            |                              |
| Ho(2)-O(34)   | 2.333            |                              |
| Ho(2)-O(43)   | 2.345            |                              |
| Ho(2)-O(40)   | 2.349            |                              |
| Ho(2)-O(37)#3 | 2.464            |                              |
| Ho(2)-O(42)   | 2.476            |                              |
| Ho(2)-O(33)   | 2.494            |                              |
| Er(1)-O(4)    | 2.209            | 2.351                        |
| Er(1)-O(43)#3 | 2.257            |                              |
| Er(1)-O(44)#3 | 2.309            |                              |
| Er(1)-O(37)#3 | 2.341            |                              |
| Er(1)-O(36)   | 2.388            |                              |
| Er(1)-O(37)   | 2.393            |                              |
| Er(1)-O(33)   | 2.402            |                              |
| Er(1)-O(34)   | 2.44             |                              |
| Er(2)-O(38)#3 | 2.249            |                              |
| Er(2)-O(31)   | 2.275            |                              |
| Er(2)-O(34)   | 2.299            |                              |
| Er(2)-O(43)   | 2.32             |                              |
| Er(2)-O(40)   | 2.329            |                              |
| Er(2)-O(37)#3 | 2.442            |                              |
| Er(2)-O(42)   | 2.482            |                              |
| Er(2)-O(33)   | 2.483            |                              |
| Tm(1)-O(2)    | 2.229            | 2.356                        |
| Tm(1)-O(37)   | 2.26             |                              |
| Tm(1)-O(38)   | 2.326            |                              |
| Tm(1)-O(43)   | 2.359            |                              |
| Tm(1)-O(42)#3 | 2.377            |                              |
| Tm(1)-O(43)#3 | 2.387            |                              |
| Tm(1)-O(32)   | 2.401            |                              |

|               |       |       |
|---------------|-------|-------|
| Tm(1)-O(40)#3 | 2.431 |       |
| Tm(2)-O(44)   | 2.257 |       |
| Tm(2)-O(26)   | 2.276 |       |
| Tm(2)-O(37)#3 | 2.307 |       |
| Tm(2)-O(40)#3 | 2.312 |       |
| Tm(2)-O(34)#3 | 2.318 |       |
| Tm(2)-O(43)   | 2.447 |       |
| Tm(2)-O(36)#3 | 2.475 |       |
| Tm(2)-O(32)   | 2.549 |       |
| Yb(1)-O(2)    | 2.185 | 2.334 |
| Yb(1)-O(37)   | 2.235 |       |
| Yb(1)-O(43)   | 2.321 |       |
| Yb(1)-O(38)   | 2.335 |       |
| Yb(1)-O(42)#3 | 2.353 |       |
| Yb(1)-O(32)   | 2.356 |       |
| Yb(1)-O(43)#3 | 2.396 |       |
| Yb(1)-O(40)#3 | 2.406 |       |
| Yb(2)-O(26)   | 2.221 |       |
| Yb(2)-O(44)   | 2.251 |       |
| Yb(2)-O(37)#3 | 2.29  |       |
| Yb(2)-O(40)#3 | 2.301 |       |
| Yb(2)-O(34)#3 | 2.303 |       |
| Yb(2)-O(43)   | 2.414 |       |
| Yb(2)-O(36)#3 | 2.449 |       |
| Yb(2)-O(32)   | 2.535 |       |
| Lu(1)-O(2)    | 2.171 | 2.322 |
| Lu(1)-O(37)   | 2.221 |       |
| Lu(1)-O(38)   | 2.307 |       |
| Lu(1)-O(43)   | 2.32  |       |
| Lu(1)-O(42)#5 | 2.345 |       |
| Lu(1)-O(32)   | 2.369 |       |
| Lu(1)-O(40)#5 | 2.392 |       |
| Lu(1)-O(43)#5 | 2.393 |       |
| Lu(2)-O(44)   | 2.209 |       |
| Lu(2)-O(26)   | 2.229 |       |
| Lu(2)-O(40)#5 | 2.269 |       |
| Lu(2)-O(37)#5 | 2.273 |       |
| Lu(2)-O(34)#5 | 2.301 |       |
| Lu(2)-O(43)   | 2.393 |       |
| Lu(2)-O(36)#5 | 2.436 |       |
| Lu(2)-O(32)   | 2.525 |       |
| Lu(1)-O(2)    | 2.171 |       |
| Y(1)-O(2)     | 2.223 | 2.367 |

|              |       |  |
|--------------|-------|--|
| Y(1)-O(37)   | 2.262 |  |
| Y(1)-O(38)   | 2.345 |  |
| Y(1)-O(43)   | 2.372 |  |
| Y(1)-O(32)   | 2.394 |  |
| Y(1)-O(43)#3 | 2.404 |  |
| Y(1)-O(42)#3 | 2.404 |  |
| Y(1)-O(40)#3 | 2.432 |  |
| Y(2)-O(44)   | 2.272 |  |
| Y(2)-O(26)   | 2.296 |  |
| Y(2)-O(37)#3 | 2.327 |  |
| Y(2)-O(40)#3 | 2.34  |  |
| Y(2)-O(34)#3 | 2.348 |  |
| Y(2)-O(43)   | 2.462 |  |
| Y(2)-O(36)#3 | 2.471 |  |
| Y(2)-O(32)   | 2.529 |  |
| Y(1)-O(2)    | 2.223 |  |
